# Supplementary material for: Linker length-dependent hydrogen peroxide photosynthesis performance over crystalline covalent organic frameworks
Source: Royal Society of Chemistry journal article supplement (doi:10.1039/d3ce00607g), 2023-01-01
Supplement: d3ce00607g1.pdf [file d3ce00607g1.pdf]

## Supporting information

### **Linker length-dependent hydrogen peroxide photosynthesis performance over crystalline covalent organic frameworks**

*Tao Yang,<sup>a</sup> Yingchu Wang,<sup>a</sup> Yue Chen,<sup>a</sup> Xueqing Peng,<sup>a</sup> Hengqiang Zhang\*<sup>b</sup> and Aiguo Kong\*<sup>a</sup>*

*<sup>a</sup>School of Chemistry and Molecular Engineering, East China Normal University, 500 Dongchuan Road, Shanghai 200241, P.R. China. E-mail: agkong@chem.ecnu.edu.cn.*

*<sup>b</sup>College of Chemistry and Chemical engineering, Hebei Normal University for Nationalities, Chengde 067000, P.R. China. E-mail: hqzhang@hbun.edu.cn*

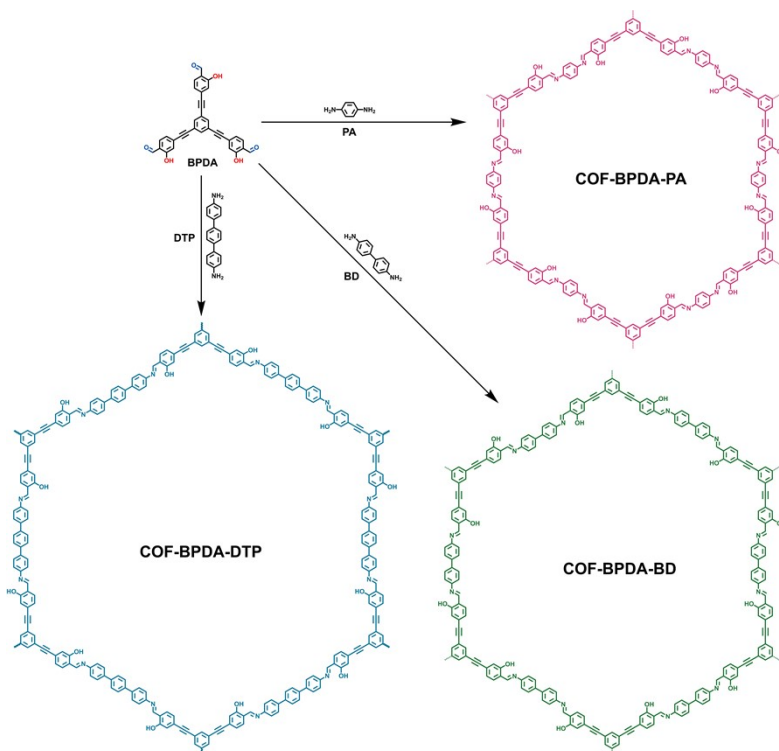

**Figure S1.** Synthetic route of COF-BPDA-DTP, COF-BPDA-BD and COF-BPDA-PA.

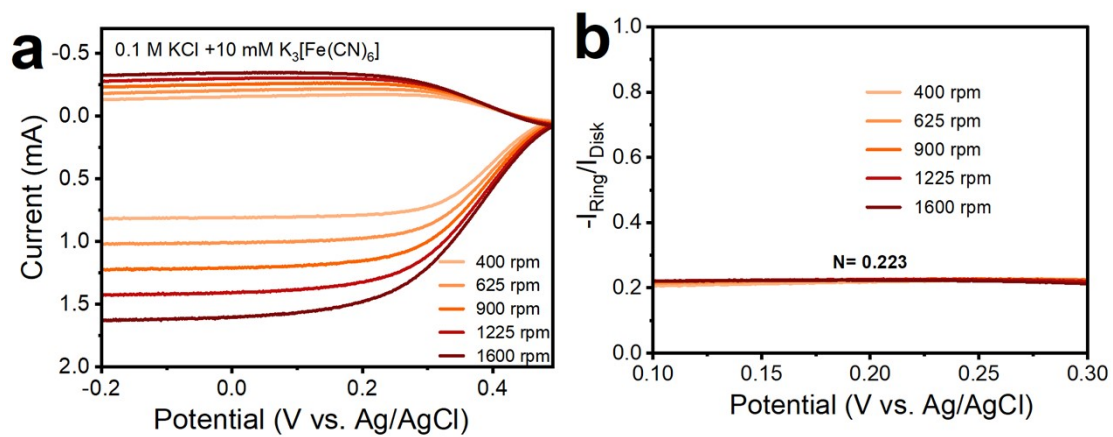

**Figure S2.** (a) The LSV curves at different rotate speeds. (b) The calculated collection efficiency ( $N$ ) for RRDE

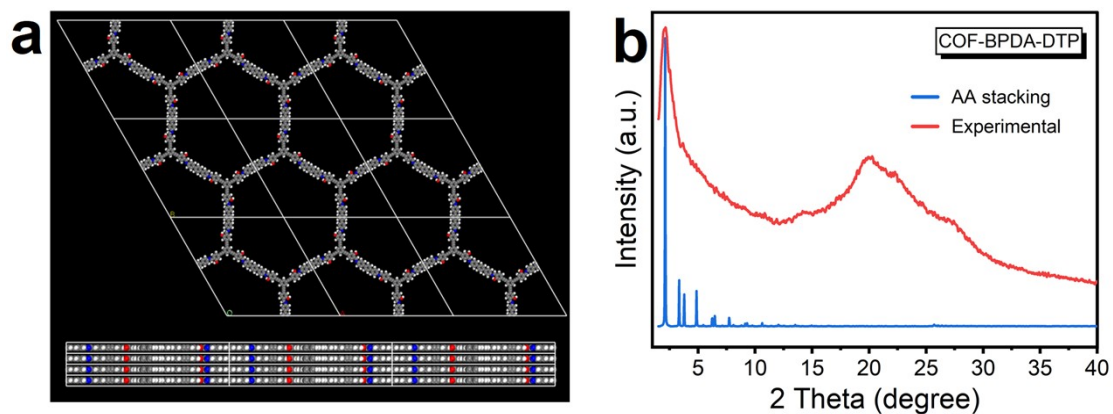

**Figure S3.** (a) Eclipsed (AA) stacking mode of COF-BPDA-DTP. (b) Comparison between experimental PXRD pattern and simulated pattern. White, gray, blue, and red spheres represent H, C, N, and O atoms, respectively.

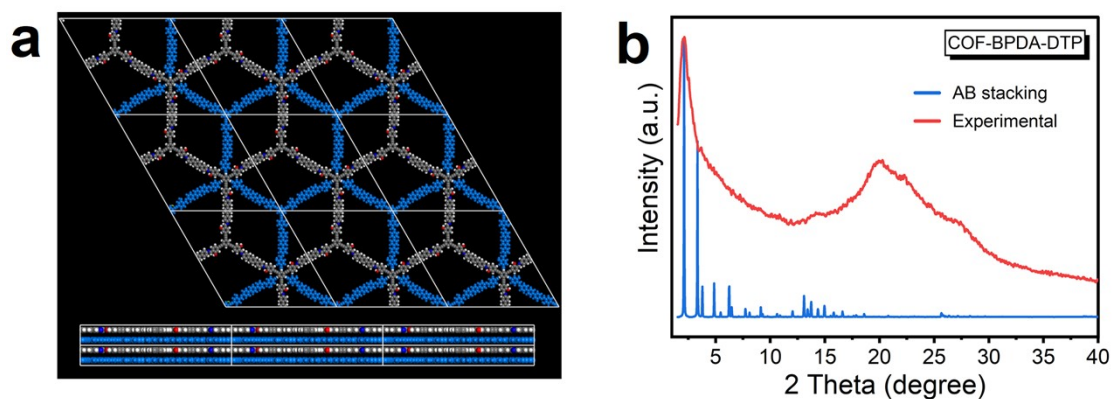

**Figure S4.** (a) Staggered (AB) stacking mode of COF-BPDA-DTP. (b) Comparison between experimental PXRD pattern and simulated pattern. White, gray, blue, and red spheres represent H, C, N, and O atoms, respectively; the second layer is highlighted in blue for clarity.

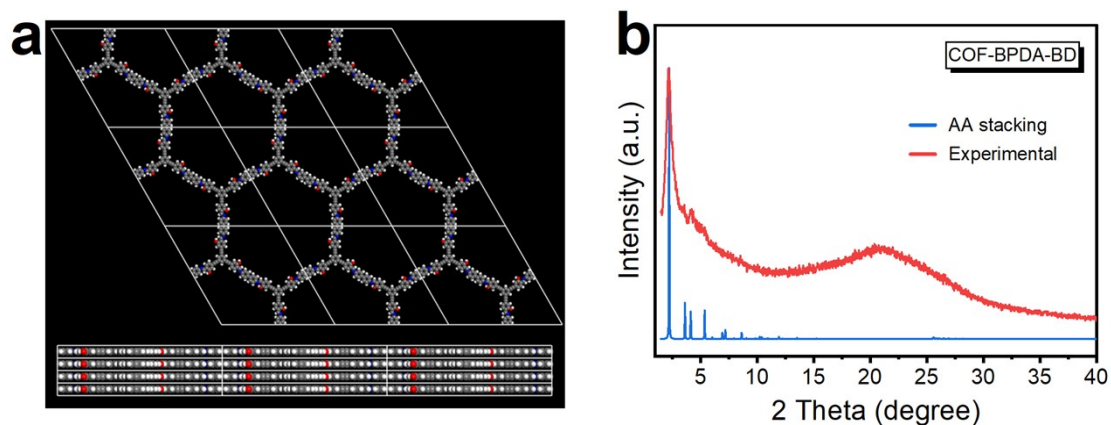

**Figure S5.** (a) Eclipsed (AA) stacking mode of COF-BPDA-BD. (b) Comparison between experimental PXRD pattern and simulated pattern. White, gray, blue, and red spheres represent H, C, N, and O atoms, respectively.

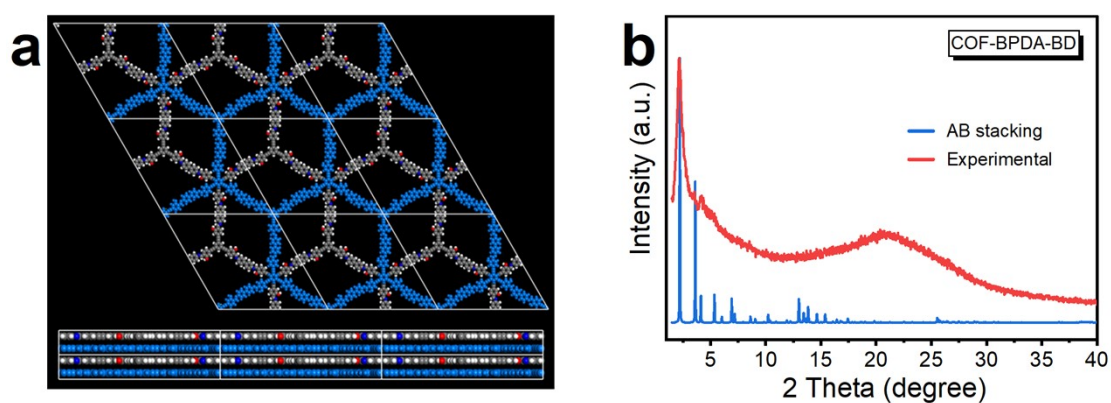

**Figure S6.** (a) Staggered (AB) stacking mode of COF-BPDA-BD. (b) Comparison between experimental PXRD pattern and simulated pattern. White, gray, blue, and red spheres represent H, C, N, and O atoms, respectively; the second layer is highlighted in blue for clarity.

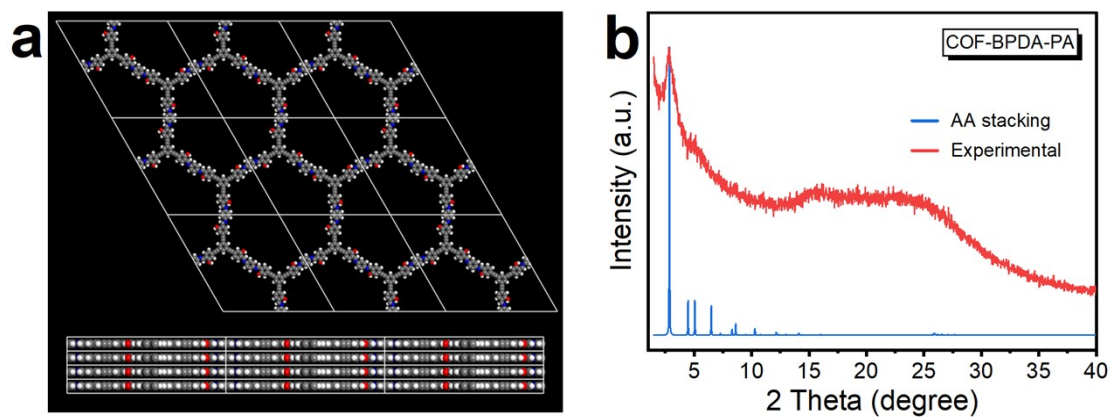

**Figure S7.** (a) Eclipsed (AA) stacking mode of COF-BPDA-PA. (b) Comparison between experimental PXRD pattern and simulated pattern. White, gray, blue, and red spheres represent H, C, N, and O atoms, respectively.

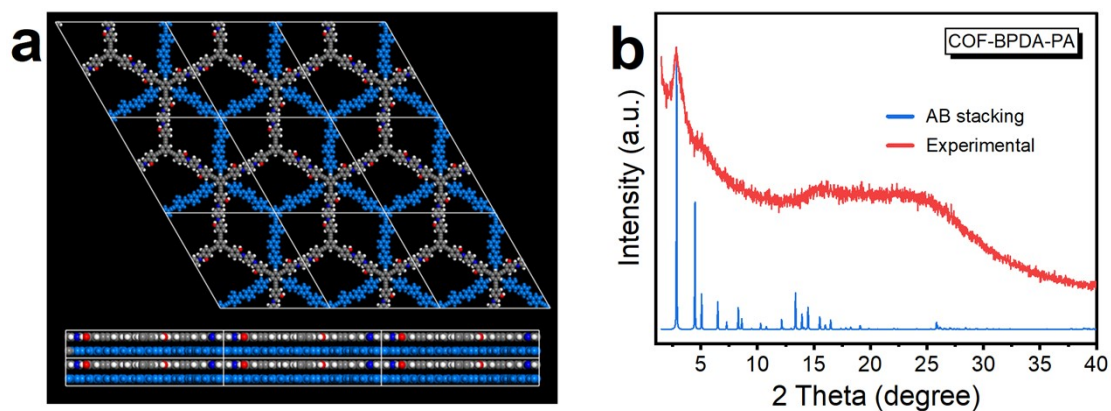

**Figure S8.** (a) Staggered (AB) stacking mode of COF-BPDA-PA. (b) Comparison between experimental PXRD pattern and simulated pattern. White, gray, blue, and red spheres represent H, C, N, and O atoms, respectively; the second layer is highlighted in blue for clarity.

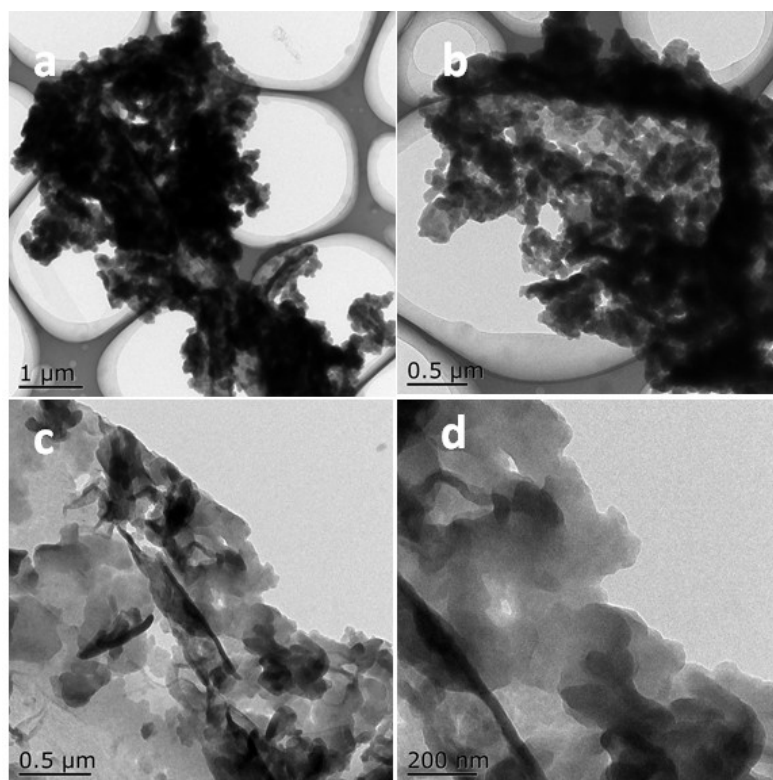

**Figure S9.** TEM images of COF-BPDA-BD (a and b) and COF-BPDA-PA (c and d)

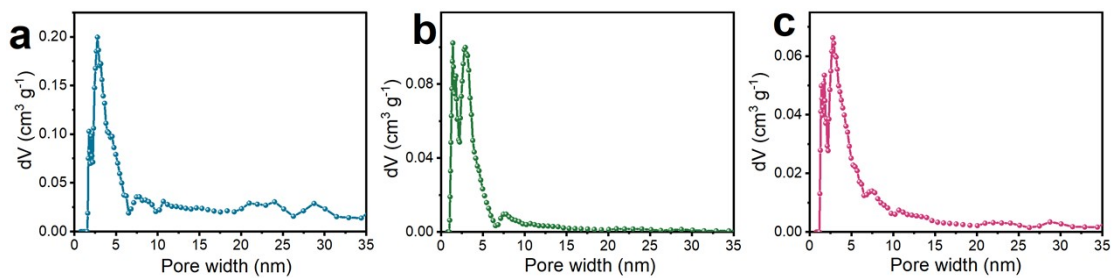

**Figure S10.** The pore size distributions of (a) COF-BPDA-DTP, (b) COF-BPDA-BD, and (c) COF-BPDA-PA.

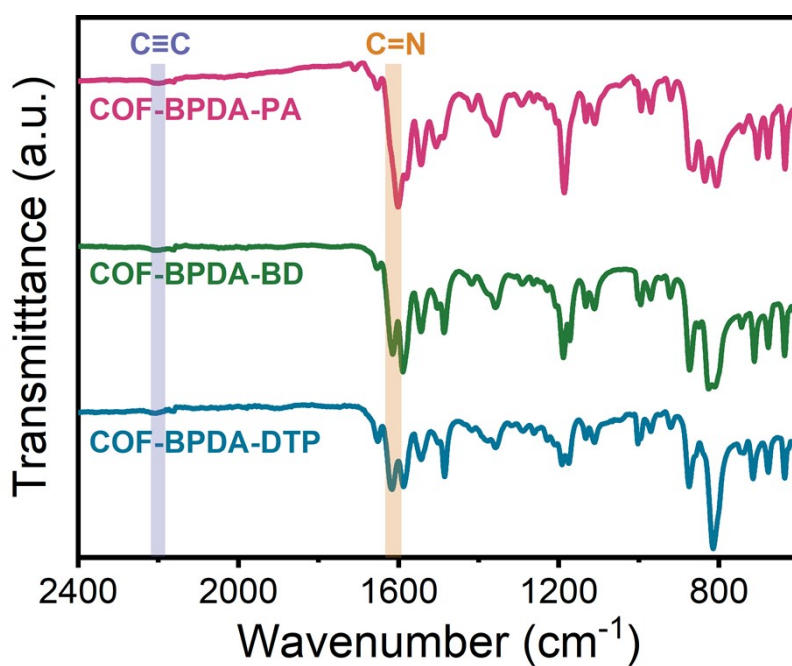

**Figure S11.** FT-IR spectra of COF-BPDA-DTP, COF-BPDA-BD and COF-BPDA-PA.



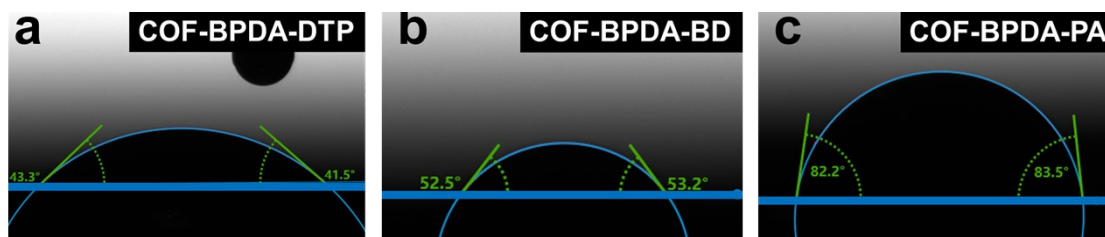

**Figure S12.** The water contact angle of (a) COF-BPDA-DTP, (b) COF-BPDA-BD and (c) COF-BPDA-PA.

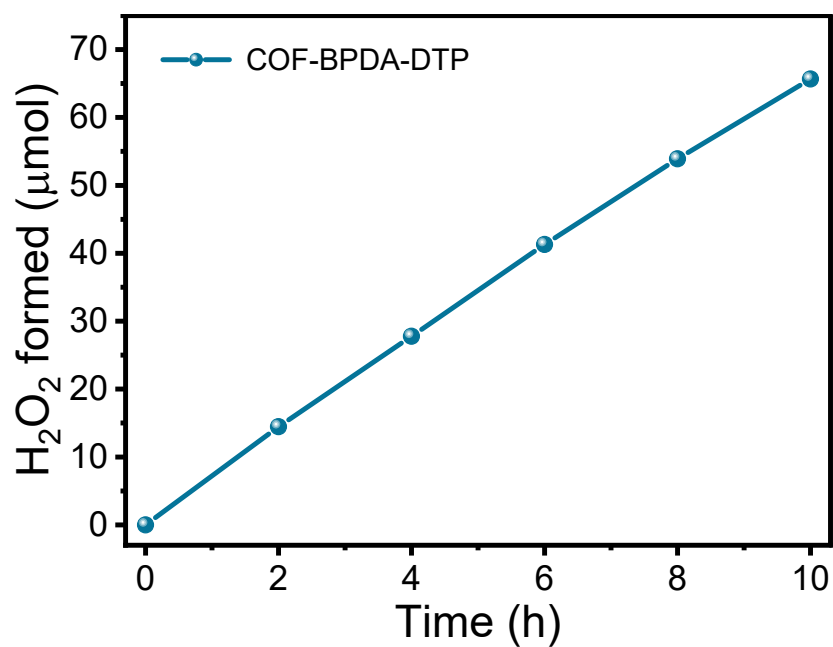

**Figure S13.** The time-amount curves for photocatalytic H<sub>2</sub>O<sub>2</sub> production over COF-BPDA-DTP (35mg, 40 mL pure water).

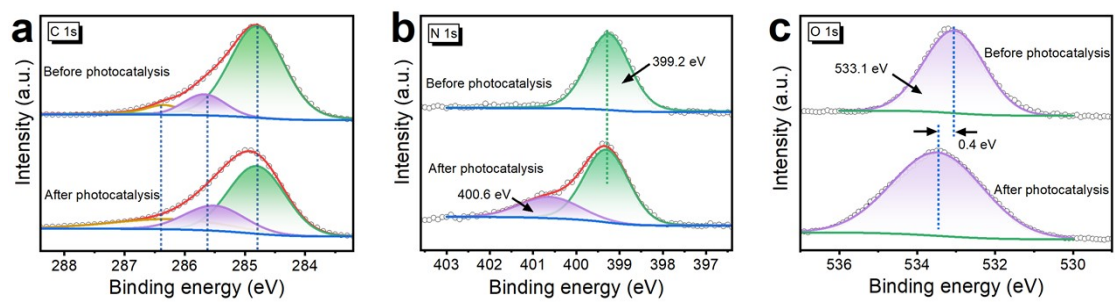

**Figure S14.** (a) C 1s, (b) N 1s and (c) O 1s XPS spectra of COF-BPDA-DTP before and after undergoing photocatalysis.

**Table S1.** The comparison of H<sub>2</sub>O<sub>2</sub> production rate with other reported photocatalysts without sacrificial reagents.

| Samples             | H <sub>2</sub> O <sub>2</sub> yield rate ( $\mu\text{mol h}^{-1} \text{g}_{\text{cat}}^{-1}$ ) | Test conditions                 | Irradiated conditions      | Solvent          | Ref. |
|---------------------|------------------------------------------------------------------------------------------------|---------------------------------|----------------------------|------------------|------|
| CTF-BDDBN           | 97                                                                                             | 30 mg catalysts and 50 mL water | $\lambda > 420 \text{ nm}$ | H <sub>2</sub> O | S1   |
| COF-TfpBpy          | 695                                                                                            | 5 mg catalysts and 10 mL water  | $\lambda > 420 \text{ nm}$ | H <sub>2</sub> O | S2   |
| MRF-250             | 582                                                                                            | 50 mg catalysts and 30 mL water | $\lambda > 420 \text{ nm}$ | H <sub>2</sub> O | S3   |
| N <sub>0</sub> -COF | 1570                                                                                           | 10 mg catalysts and 20 mL water | $\lambda = 495 \text{ nm}$ | H <sub>2</sub> O | S4   |
| 1H-COF              | 700                                                                                            | 30 mg catalysts and 30 mL water | $\lambda > 420 \text{ nm}$ | H <sub>2</sub> O | S5   |
| DE7-M               | 266                                                                                            | 30 mg catalysts and 50 mL water | $\lambda > 420 \text{ nm}$ | H <sub>2</sub> O | S6   |

|              |      |                                  |                    |                  |           |
|--------------|------|----------------------------------|--------------------|------------------|-----------|
| SonoCOF-F2   | 1244 | 3 mg catalysts and 5 mL water    | $\lambda > 420$ nm | H <sub>2</sub> O | S7        |
| HEP-TAPT-COF | 1750 | 50 mg catalysts and 100 mL water | $\lambda > 420$ nm | H <sub>2</sub> O | S8        |
| FS-COFs      | 3904 | 5 mg catalysts and 20 mL water   | $\lambda > 420$ nm | H <sub>2</sub> O | S9        |
| TTF-BT-COF   | 2760 | 5 mg catalysts and 10 mL water   | $\lambda > 420$ nm | H <sub>2</sub> O | S10       |
| TTF-pT-COF   | 996  |                                  |                    |                  |           |
| TPE-BT-COF   | 592  |                                  |                    |                  |           |
| COF-BPDA-PA  | 450  | 5 mg catalysts and 40 mL water   | $\lambda > 420$ nm | H <sub>2</sub> O | This work |
| COF-BPDA-BD  | 1040 |                                  |                    | H <sub>2</sub> O |           |
| COF-BPDA-DTP | 1164 |                                  |                    | H <sub>2</sub> O |           |

## References

- S1. L. Chen, L. Wang, Y. Wan, Y. Zhang, Z. Qi, X. Wu and H. Xu, *Adv. Mater.*, 2020, **32**, e1904433.
- S2. M. Kou, Y. Wang, Y. Xu, L. Ye, Y. Huang, B. Jia, H. Li, J. Ren, Y. Deng, J. Chen, Y. Zhou, K. Lei, L. Wang, W. Liu, H. Huang and T. Ma, *Angew. Chem. Int. Ed.*, 2022, **61**, e202200413.
- S3. L. Yuan, C. Zhang, J. Wang, C. Liu and C. Yu, *Nano Res.*, 2021, **14**, 3267-3273.
- S4. S. Chai, X. Chen, X. Zhang, Y. Fang, R. S. Sprick and X. Chen, *Environ. Sci.: Nano.*, 2022, **9**, 2464-2469.
- S5. H. Acta CardiologicaHu, Y. Tao, D. Wang, C. Li, Q. Jiang, Y. Shi, J. Wang, J. Qin, S. Zhou and Y. Kong, *J. Colloid Interface Sci.*, 2023, **629**, 750-762.
- S6. L. Liu, M. Y. Gao, H. Yang, X. Wang, X. Li and A. I. Cooper, *J. Am. Chem. Soc.*, 2021, **143**, 19287-19293.
- S7. W. Zhao, P. Yan, B. Li, M. Bahri, L. Liu, X. Zhou, R. Clowes, N. D. Browning, Y. Wu, J. W. Ward and A. I. Cooper, *J. Am. Chem. Soc.*, 2022, **144**, 9902-9909.
- S8. D. Chen, W. Chen, Y. Wu, L. Wang, X. Wu, H. Xu and L. Chen, *Angew. Chem. Int. Ed.*, 2022, **62**, e202217479.
- S9. Y. Luo, B. Zhang, C. Liu, D. Xia, X. Ou, Y. Cai, Y. Zhou, J. Jiang and B. Han, *Angew. Chem. Int. Ed.*, 2023, e202305355.
- S10. J. N. Chang, Q. Li, J. W. Shi, M. Zhang, L. Zhang, S. Li, Y. Chen, S. L. Li and Y. Q. Lan, *Angew. Chem. Int. Ed.*, 2022, **62**, e202218868.
